# Supplementary material
Source: Springer Nature journal article supplement (https://www.springermedizin.de/resource/supplementary/12887_2014_1064_MOESM1_ESM.pdf/9476408)

■ commercial baby food    ▨ non commercial baby food    □ BM    ▩ F

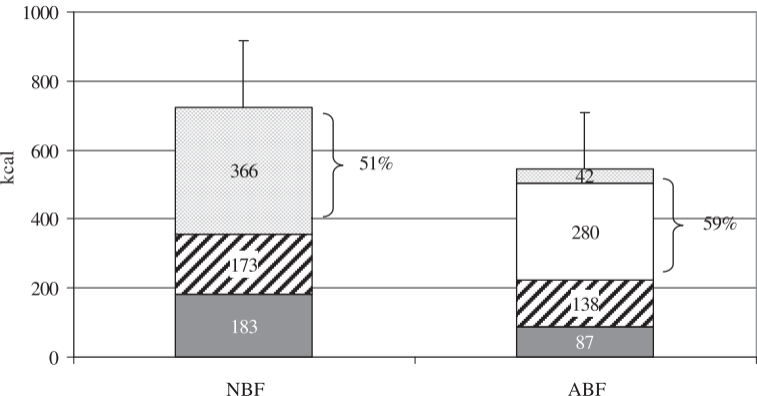

Supplement: MOESM1 [file 9476408]
